# Supplementary material
Source: ML conference proceedings conference paper supplement (https://openreview.net/forum?id=6F5SQCoNG6)
Supplement: supplementary_material [file attachment]

# A Descriptive Basketball Highlight Dataset for Automatic Commentary Generation

Anonymous Authors

## ABSTRACT

The emergence of video captioning makes it possible to automatically generate natural language description for a given video. However, generating detailed video descriptions that incorporate domain-specific information remains an unsolved challenge, holding significant research and application value, particularly in domains such as sports commentary generation. Moreover, sports event commentary goes beyond being a mere game report, it involves entertaining, metaphorical, and emotional descriptions. To promote the field of sports commentary automatic generation, in this paper, we introduce a novel dataset, the Basketball Highlight Commentary (BH-Commentary), comprising approximately 4K basketball highlight videos with groundtruth commentaries from professional commentators. In addition, we propose an end-to-end framework as a benchmark for basketball highlight commentary generation task, in which a lightweight and effective prompt strategy is designed to enhance alignment fusion among visual and textual features. Extensive experiments on the BH-Commentary dataset demonstrate the validity of the dataset and the effectiveness of the proposed benchmark for sports highlight commentary generation. (The dataset is available at <https://anonymous.4open.science/r/dataset-DC8E>)

## CCS CONCEPTS

• Computing methodologies → Computer vision tasks.

## KEYWORDS

Dataset, Video Captioning, Basketball Commentary Generation, Vision-Language

## 1 INTRODUCTION

Video captioning [48, 63] stands as a challenging and essential task in both the computer vision and natural language processing communities. Aimed at automatically generate the description about the visual content of a given video in natural language, this task has gained significant attention in recent years due to its importance across various applications. One good example is sports commentary generation (especially for team sports such as football, basketball, and volleyball etc). Figure 1 illustrates the distinction between the conventional video captioning task and our sports commentary generation. We can notice that the conventional video

captioning can solely provide a macroscopic perspective description of the video (e.g., a scene featuring players are playing basketball). In contrast, the commentary generation is capable of offering more vivid description of individual technical movements and the coordination between team members (e.g., Player A launches a long pass from the backcourt, setting up Player B for a one-handed slam dunk, showcasing flawless teamwork.).

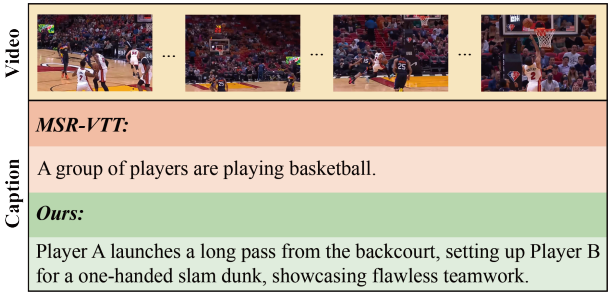

Figure 1: Comparison between previous work and ours. Our commentary generation presents a more realistic and vivid scene.

For a sports highlight video that showcases exquisite individual move and teamwork, the key of commentary generation lies in capturing the the visual characteristics of athletes' technical movements and map them into statements that contain technical terms and descriptive words. However, for basketball highlight video, this presents several challenges. Firstly, the basketball highlights usually contain players' gorgeous technical movements and exquisite teamwork, which provides a visual basis for downstream generative model. Accurately and effectively capturing and representing these visual features from video can offer more informative cues for commentary generation. Several recent studies [50, 64, 70, 73] focused to leverage the action information contained in videos to enhance the downstream task. However, such studies usually employ multiple feature extractors that trained for visual understanding tasks to extract 2D and 3D visual features. Although these approaches have shown promising results, there raises problems about the extent to which these extracted features from off-line extractors can be effectively adapted to suit the requirements of the captioning task. Secondly, the generated commentaries should highlight the player's gorgeous moves and coordination, that is the model should be able to generate commentaries containing the player's technical movements based on visual information. Most of the existing research [3, 19, 47, 55] tends to emphasize the effective exploitation of visual features, with few taking into account the significance of cross-modal interactive fusion and explicitly leveraging such interaction to enhance the downstream generation. Moreover, as for basketball highlight video, the commentary on it must not be a simple description of the player's actions. While it is difficult to

Permission to make digital or hard copies of all or part of this work for personal or professional use, by individuals or small businesses, is granted by ACM, provided that the fee of \$12.00 is paid directly to ACM. This fee code for users and organizations is 978-1-60558-111-1/24/0000-0000. Distributed for profit or commercial advantage and that copies bear this notice and the full citation on the first page. Copyrights for components of this work owned by others than the author(s) must be honored. Abstracting with credit is permitted. To copy otherwise, or republish, to post on servers or to redistribute to lists, requires prior specific permission and/or a fee. Request permissions from [permissions@acm.org](mailto:permissions@acm.org).  
ACM MM, 2024, Melbourne, Australia  
© 2024 Copyright held by the owner/author(s). Publication rights licensed to ACM.  
ACM ISBN 978-1-60558-111-1/24/0000-0000  
<https://doi.org/10.1145/nnnnnnnn.nnnnnnnn>

train a model that can generate commentary that is descriptive and professional in content on the basis of existing video captioning datasets. In this context, there is a significant need for a readily accessible sports commentary dataset, annotated by professional sports analysts, to facilitate research in this area.

To explicitly tackle these challenges and develop a practical sports highlight commentary generation system, particularly in the context of basketball highlight video, in this paper, we propose an end-to-end framework for basketball highlight commentary generation. Specifically, for visual feature extraction, taking inspiration from the recent works of transformer-based models in video understanding [2, 13, 14], we utilize a video transformer to extract features with the original video as input. In contrast to employing separate offline 2D and 3D visual extractors, our model integrates visual extraction within a unified framework, along with subsequent multi-modal feature encoding and commentary generation modules. This integration enhances the suitability of the extracted visual features for downstream tasks. As for multi-modal feature encoding, a lightweight but effective prompt strategy is designed to promote the interaction fusion between visual and textual features, which prompts the model to focus on the visual representations that are most relevant to the text. It is worth noting that in our proposed model, each component is integrated into the unified framework, which makes the components of the model compatible and mutually reinforcing. Moreover, to initiate shareable research in this emerging field, we are introducing a new dataset, called Basketball Highlight Commentary (BH-Commentary). This dataset comprises 4,396 high-definition NBA basketball highlight videos from the Tencent Video website, each of which is annotated with detailed descriptive commentary.

In summary, the main contributions of this work are summarized as follows:

- We collect a novel high-quality dataset for sports highlight commentary generation, which contains 4K basketball highlight videos from websites and corresponding commentaries from professional commentators.
- We propose an end-to-end benchmark model for sports highlight commentary generation, which integrates visual feature extraction, multi-modal feature encoding and commentary generation task into a unified framework.
- A lightweight and effective prompt strategy is designed to promote multi-modal feature interactive fusion.
- Extensive experiments on the collected dataset demonstrate the proposed benchmark model's effectiveness and the validity of the dataset.

## 2 RELATED WORKS

### 2.1 Video Captioning

Video captioning aims to generate a condensed natural linguistic sentence that describes the main event of a video. Early researches adopt the template-based strategy to generate video captions [24, 60], this sort of methods usually align the sentence components to the detected visual content, and generate the description based on the pre-defined templates, which are typically limited by the fixed templates. Recent works usually adopt encoder-decoder structure for this task [17, 48, 68], where the encoder translates

the input video to visual features, and the decoder integrates the encoded visual features and generate a natural sentence. Since without bounded by the pre-defined template, such methods can generate captions with more flexible sentence patterns. Specifically, based on the extracted visual or visual-linguistic feature, [47, 66, 69] utilize the LSTM/GRU-based architecture for caption generation task, [50, 63, 72] use transformer-based model for video captioning generation. Unlike the above models that adopt offline feature extraction, we take an end-to-end approach to integrating feature extraction with downstream task.

### 2.2 Visual Extractor

Transformer [53], adopting an attention-based encoder-decoder structure, has demonstrated promising performance on the NLP tasks. Inspired by the outstanding ability on sequence modeling, some recent researches explore transformer-based structure in the field of computer vision, achieving remarkable results on basic CV tasks [13, 18, 58, 65]. Since the competitive modeling capabilities, the visual transformers have achieved impressive performance improvement compared with the traditional methods. The application of visual transformer to video field is also gaining increasing attention. In order to cope with the characteristics of videos with long sequences, Neimark *et al.* [40] adopt temporal attention-based encoder, which could attend to all tokens in the input sequence, making the model capable of handling long sequences. Arnab *et al.* [2] introduce a transformer-based model to employ spatial-temporal attention for better video representation. Zhang *et al.* [67] propose stacked attention to aggregate spatio-temporal information contained in the video for improving representation learning. Moreover, inspired by the success of Swin Transformer in image domain [35], Liu *et al.* [36] further propose Video Swin Transformer, which introduces an inductive bias of locality in spatiotemporal domain into transformer structure, obtaining promising video representation.

### 2.3 Vision Language Model

Joint vision language understanding associates the computer vision and natural language processing together, and has attracted increasing attention from the two fields. Recent researches [27, 50] have shown the success in the field of multi-modal representation learning for vision-language understanding and generation, including downstream tasks like video-language retrieval [6, 16], video question answering [26, 32], and video captioning [56, 62]. In order to get better performance, most language models tend to adopt large scale training data, causing the loss of computation and memory. With the success of the language pre-training and video-text pre-training strategy, recent works attempt to employ the pre-trained language models to the vision language task. For example, by freezing the weights of a pre-trained language model, [1, 52, 57] show promising results in vision language tasks. Moreover, masked language models also show success in language works [12, 25, 31], which pre-trains a transformer-based structure to learn language representations, achieving competitive performance in downstream tasks after being fine-tuned. The success of masked language models also drives the exploration the works of applying it to the multi-modal representation model with paired visual-textual

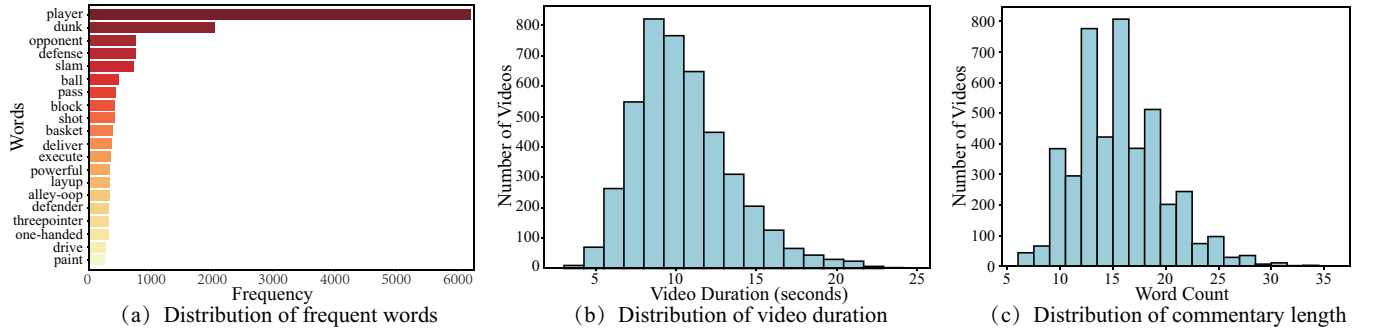

**Figure 2: Illustrations of BH-Commentary dataset statistics. (a-c) Distribution of frequent words, video duration and commentary length of the dataset in English version.**

data [15, 29, 37], which show competitive performance on vision language tasks.

| Dataset                 | Domain            | #Video      | #Sentence   | Total Dur(h) |
|-------------------------|-------------------|-------------|-------------|--------------|
| MSVD [9]                | Open              | 1970        | 70k         | 5.3          |
| MSR-VTT [59]            | Open              | 10k         | 200k        | 41.2         |
| MPII-MD [46]            | Movie             | 68.3k       | 68.3k       | 73           |
| TACoS [45]              | Cooking           | 127         | 11.8k       | -            |
| YouCook [11]            | Cooking           | 88          | 2.7k        | 2.3          |
| YouCook2 [71]           | Cooking           | 2k          | 15.4k       | 176          |
| ActivityNet-Caption [7] | Open              | 20k         | 100k        | 840          |
| SoccerNet-caption [39]  | Soccer Game       | 0.9k        | 36k         | 715.9        |
| SVCDV [44]              | Volleyball        | 4.8k        | 44k         | -            |
| FSN [64]                | Basketball        | 2k          | 6.5k        | -            |
| <b>BH-Commentary</b>    | <b>Basketball</b> | <b>4.3k</b> | <b>4.3k</b> | <b>10.1</b>  |

**Table 1: Comparison with existing video captioning datasets.**

### 3 BASKETBALL HIGHLIGHT COMMENTARY DATASET

Basketball Highlight Commentary (BH-Commentary) is a basketball highlight video commentary generation dataset. Each highlight clip is annotated with a description of its content. Unlike previous video captioning datasets that describe motions from a macro perspective, this dataset focuses on providing a lively language of commentary on the technical movements of players in basketball videos, where each comment corresponds to one event highlight. In the following, we introduce the dataset collection process and provide a comprehensive statistical analysis on this dataset.

#### 3.1 Dataset Collection

We collect 4,800 highlight videos from the NBA's 2020-2023 season from websites. And we filter out videos that are too short and had poor visual quality, ultimately choosing 4,396 videos with diverse and detailed motions for the final annotation process. Basketball highlights videos in our dataset involve six categories of basketball actions, including pass, dunk, block, shot, steal and layup, as shown in Figure 3(a). All videos are available at 25fps in two resolutions: 480p and 720p. The commentaries from professional commentators are initially presented in Chinese version in audio form, which we

transcribe into English text through transcription and proofreading. Moreover, in line with conventional captioning datasets, we offer the anonymized version of the captions in which specific players' names are replaced with generic tokens. In fact, most of existing captioning models are not capable to accurately identify the individuals featured in the videos. Since generating accurate names would be nearly impossible without the inclusion of specifically designed modules for identity classification and identification.

| Dataset       | verb per sent | noun per sent | adj per sent | adv per sent |
|---------------|---------------|---------------|--------------|--------------|
| MSR-VTT [59]  | 1.84          | 3.20          | 0.60         | 0.15         |
| BH-Commentary | <b>1.42</b>   | <b>6.31</b>   | <b>1.30</b>  | <b>0.55</b>  |

**Table 2: Comparison of the average number of verbs, nouns, adjectives and adverbs per sentence of our dataset and MSR-VTT dataset.**

#### 3.2 Dataset Statistics

Our dataset includes 4,396 videos, each of which corresponds to one annotated statements from professional commentators. Each video has an average of 15.3 words. On average, each word describes 0.5s in video and 4.8% of the entire video, which demonstrates that our annotations are informative and detailed, comprehensively encompassing the contents in the video. Table 1 provides a comparison of major statistics between our dataset and other existing popular video captioning datasets. Unlike other datasets collect videos from common domain or generate them virtually that stand out with longer total video duration, our dataset mainly focuses on highlight from real basketball game scenes. Based on a limited number of basketball game highlight and the corresponding commentaries from professional commentators, our dataset contains 4,396 highlight videos with a total of 10.1 hours and the same number of annotations. As shown in Figure 2(a), in our dataset, the most frequently occurring words are the names of the players, followed by words that are semantically related to basketball and associated elements. In addition, the distribution of video duration of our dataset is shown in Figure 2(b), the longest video lasts 27.8s and the shortest one lasts 3.1s, and the average video duration is 10.5s. And the distribution of commentary length of our dataset is shown

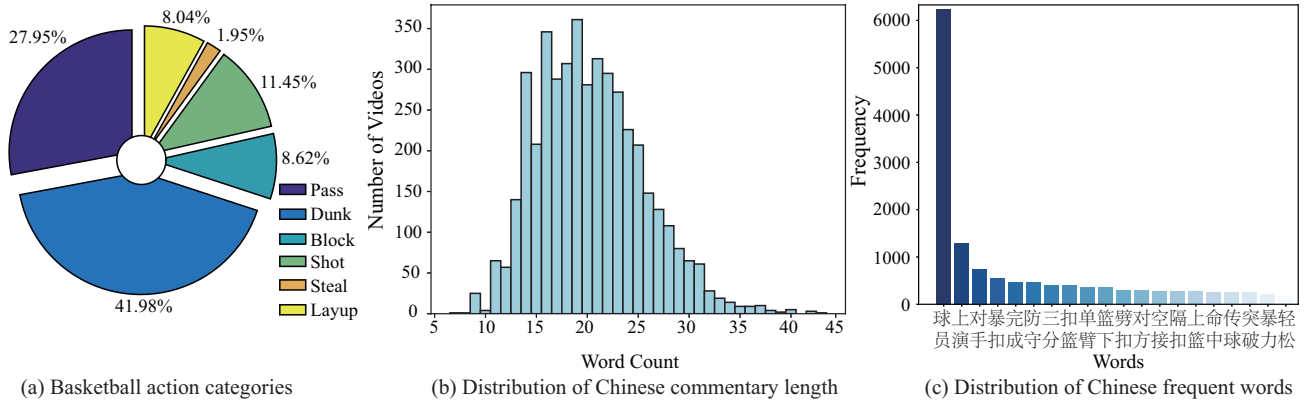

**Figure 3: Illustrations of BH-Commentary dataset statistics. (a) Distribution of basketball action categories. (b-c) Distribution of frequent words and commentary length in Chinese version.**

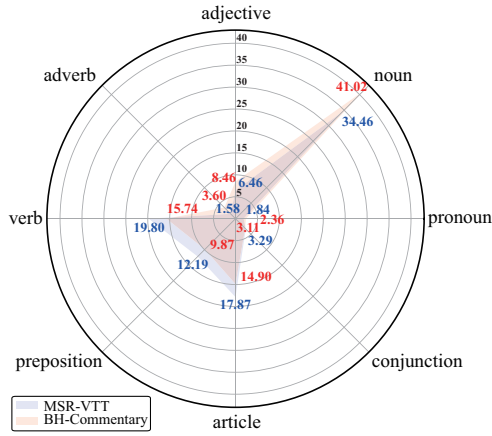

**Figure 4: The parts of speech distribution of BH-Commentary and MSR-VTT dataset. All the values in the figure are the percentage of parts of speech ratio. There are more adjectives and adverbs in BH-Commentary, as this is commentary generation dataset focusing on providing descriptive words for players' motions.**

in Figure 2(c), the length of the commentaries in our dataset varies, with the longest being 36 words and the shortest being 6 words.

As for the Chinese version of our dataset, Figure 3(b-c) illustrate the distribution of frequent words and commentary length in Chinese version. As shown in Figure 3(b), the length of the Chinese commentaries in our dataset varies, with the longest being 43 words and the shortest being 7 words. In addition, similar to the English version, in Chinese version of our dataset, the most frequently occurring words are the names of the players, followed by terms that are semantically related to basketball and associated elements, as shown in Figure 3(c).

Moreover, we conduct a parts of speech analysis on our dataset in comparison with MSR-VTT [59]. As depicted in Figure 4, our dataset exhibits a higher proportion of nouns, adverbs, and adjectives, which underscores our dataset's increased focus on players,

their technical movements, and the accompanying descriptive elements. In Table 2, the comparison of the average number of verbs, nouns, adjectives, and adverbs per sentence further demonstrate the descriptive advantage of our annotations. In each highlights video, our annotations feature a higher count of descriptive words per sentence, this is in line with our objective: delivering vivid commentaries for sports highlights. And for dataset splitting, we take the same settings as MSR-VTT dataset that we randomly divided the dataset into training, validation, and testing sets with proportions of 65%, 5%, and 30%, respectively.

### 3.3 Novelty

Committed to advancing the researches about video captioning/description generation, multiple datasets covering various domains have been introduced. In general, video captioning tasks can be primarily categorized into two families: single event caption generation [9, 59] and multiple events caption generation [39, 64, 71]. As shown in Table 1, due to the objective reasons such as the difficulty of video collection and annotation, previous studies rarely focus on sports video description generation. Some studies, such as [39], utilize virtual methods such as games to create sports game videos for building dataset. [44] and [64] built datasets of video descriptions generation based on volleyball and basketball games.

## 4 COMMENTARY GENERATION MODEL

The goal of sports highlight commentary generation is to automatically generate eloquent and descriptive sentence to paint a vivid picture of the technical movements executed by the players in the video. This challenge raises the question of how to enable the efficient mapping of visual input to commentary output. Furthermore, the well-extracted visual features could serve as crucial visual cues for commentary generation. To tackle these problems, we first introduce a unified end-to-end multi-modal encoding framework, treating the automatic generation of sports highlights commentary as a sequence-to-sequence task, as explained in Section 4.1. Then, an effective prompt strategy is devised to enhance the alignment of multi-modal representations in Section 4.2. And the strategy of training and inference are introduced in Section 4.3.



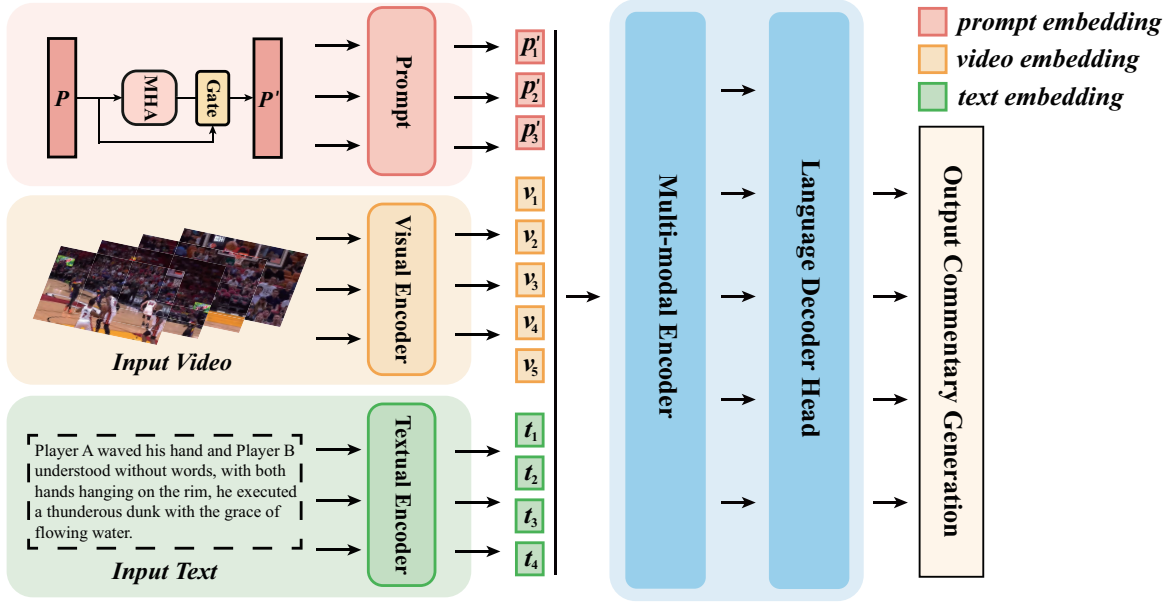

Figure 5: The overall architecture of the proposed model. We formulate the commentary generation as a sequence-to-sequence task, the raw video frames and the text are first encoded by the visual and textual encoder, respectively. The prompt embedding that utilized to facilitate the multi-modal feature fusion is aggregated with the input and the previous state, and is concatenated with the multi-modal embeddings, which are further input to the multi-modal encoder. Then the language decoder head autoregressively generates the output commentary based on the multi-modal representations.

#### 4.1 Model Architecture

We wish to design an architecture that can effectively map the sports highlight video to corresponding descriptive commentary. To achieve this goal, we introduce an end-to-end framework that takes raw sports highlight video frames as input and generates natural language commentary for input content description. Figure 5 shows the overview of our proposed benchmark model. In detail, given a pair of video  $\{f_t\}_{t=1}^T$  and text sequence  $\{s_n\}_{n=1}^L$ , where  $T$  represents the number of sampled frames from the input video, and  $L$  denotes the length of the sentence. We first separately encode them using individual encoders to obtain unimodal features, the visual encoder extracts visual features from the raw sports highlight video frames, while the text encoder embeds the textual representation. Subsequently, the multi-modal encoder further encodes the multi-modal representation based on both the visual and textual features. And the commentary is generated in an auto-regressive manner. The detailed description of each module are given as follows.

**Visual Encoder.** Drawing inspiration from the success of various transformer-based model for video representation learning in long-range temporal relationship modeling [5, 36, 61], recent advancements in video-language research [31, 51] have begun to leverage the success of video transformers, showcasing improved performance in downstream tasks. In this paper, we employ the Video Swin Transformer [36] (VST) as visual backbone for visual feature extraction, based on the frames from raw input video.

The visual encoder takes a sequence of  $T$  frames  $f \in \mathbb{R}^{H \times W \times 3}$  sampled from raw video as input, where  $H$  and  $W$  refer to the

height and width of each frame. Then the grid features are extracted from the last encoder block of VST, resulting in grid features with dimension of  $\frac{T}{2} \times \frac{H}{32} \times \frac{W}{32} \times 8C$ , where  $C$  represents the channel dimension. These grid features are then tokenized along the channel dimension, yielding a total of  $\frac{T}{2} \times \frac{H}{32} \times \frac{W}{32}$  video tokens, with each token being an  $8C$ -dimensional feature vector. For more in-depth information, please refer to [36]. These extracted visual features are then utilized as input for the multi-modal fusion encoder to facilitate the learning of cross-modal representation.

**Textual Encoder.** For text encoding, the input text sentence is first tokenized into a sequence of  $N$  tokens  $\{t_n\}_{n=1}^N$ . And two special tokens, [CLS] and [SEP], are inserted at the start and the end of the token sequence. Then, like previous works [27, 37], we utilize a lightweight word embedding layer [21] to obtain textual embeddings, which are concatenated with the visual features and then input to the multi-modal encoder.

**Multi-modal Encoder.** We utilize a transformer-based multi-modal encoder for multi-modal features encoding. Specifically, the multi-modal encoder takes two modal inputs, which correspond to the visual and textual features extracted from the two unimodal encoders. Denoting the encoded visual and textual embeddings as  $E_v \in \mathbb{R}^{T \times k}$  and  $E_t \in \mathbb{R}^{N \times k}$ , we then concatenate these two embeddings as input to the multi-modal encoder, denoted as  $E_m = [E_v; E_t] \in \mathbb{R}^{(T+N) \times k}$ , where  $[\cdot]$  denotes concatenation and  $k$  denotes the dimension of hidden state. To obtain the cross-modal representations, the visual and textual embeddings are combined through cross-attention operations. Then we conduct sequence to

sequence generation process to implement commentary generation, where we employ a causal self-attention mask, ensuring that a caption token can only attend to the previously generated output tokens.

Through our generic design, we enable end-to-end training for commentary generation using the raw video frames. Furthermore, by leveraging the versatility of the transformer architecture, our model can handle video sequences with variable lengths.

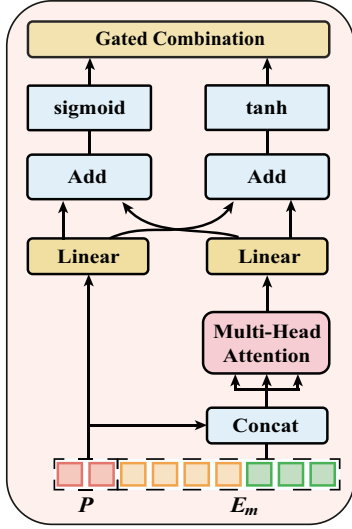

**Figure 6: The illustration of prompt embedding updating scheme. The prompt embedding is selectively updated according to the input using the multi-head attention with a residual connection.**

## 4.2 Multi-modal Fusion via Prompt

Recently, a line of works show promising performance in obtaining the desired output through prompt designing [20, 28, 30, 41]. Instead of designing manually, soft prompt is proposed as a series of continuous embeddings that are prepended to the input and updated throughout training. In this work, we propose to utilize a lightweight soft prompt strategy using the attention network with a residual connection for promoting multi-modal features interaction and fusion. Instead of using the original prompt setting [28], we pass the soft prompt embedding and multi-modal embeddings through the attention network with a residual connection. Subsequently, we reparameterize the prompt and prepend it to the multi-modal embeddings before feeding it into the multi-modal encoder. In specific, as shown in Figure 6, we set a sequence of soft prompt embedding  $P = [p_1, \dots, p_n] \in \mathbb{R}^{n \times k}$ , here  $n$  and  $k$  denote the number of and the dimension of prompt vectors respectively. With multi-head attention, we can aggregate the feature from both the multi-modal embeddings  $E_m$  and the prompt embedding  $P$ , and the prompt embedding can then be selectively updated according to both the current input and the previous state with residual connection. Then the prompt-concatenated multi-modal representations are further encoded through the multi-modal encoder. The entire

process above is denoted as below:

$$\begin{aligned} A &= \text{FFN}(\text{MHAtt}([P, E_m])), \\ S &= \tanh(W_{sp} P + W_{sa} A + b_s), \\ Z &= \text{sigmoid}(W_{zp} P + W_{za} A + b_z), \\ P' &= (1 - Z) \odot S + Z \odot P, \end{aligned} \quad (1)$$

where FFN denotes feed-forward network, MHAtt denotes multi-head attention in transformer network [53], tanh and sigmoid denote activation functions,  $\odot$  denotes Hadamard product,  $W_{sp}$ ,  $W_{sa}$ ,  $W_{zp}$  and  $W_{za}$  are trainable weights,  $b_s$  and  $b_z$  are trainable bias.

## 4.3 Training

**Train Setting.** The visual encoder is pre-trained on the Kinetics action recognition task [8]. During training, the model takes video and text input, which are further input to the visual and textual encoder for feature extraction. The prompt embedding is jointly updated with the model during training. Furthermore, all textual tokens have complete attention not only to the visual tokens but also to the prompt, ensuring that the prompt can enhance the comprehensive interaction of multi-modal features, which allows the model to effectively utilize both visual and textual modalities to generation accurate and descriptive commentary.

**Inference.** During inference, the model solely takes the video as input, and the commentary is generated in an auto-regressive manner. The model generates one textual token at a time, using the tokens generated thus far as inputs for the multi-modal transformer encoder. And the prompt is no longer updated, instead, it serves the purpose of facilitating the commentary generation.

## 5 EXPERIMENT

In this section, we demonstrate the effectiveness of our benchmark model on its ability of generating sports highlight commentary. We conduct experiments on BH-Commentary dataset, which is specifically built for this task, and we compare our model to the state of the art. We first introduce the experimental setting in Section 5.1, and the ablation study is conducted in Section 5.2. Finally, we present the experimental results and analysis in Section 5.3.

### 5.1 Experimental Setting

**Metrics.** We adopt several widely-used evaluation metrics, including BLEU@4 [42], METEOR [4], Rouge-L [33], and CIDEr [54] to measure the performance of the benchmark model. We calculate these metrics using the standard COCO evaluation tools<sup>1</sup> [10].

**Implementation Details.** Our model is implemented in PyTorch [43], the visual encoder is initialized with Kinetics-600 pre-trained weights, the textual encoder is initialized from pre-trained BERT-Base [12], and the multi-modal encoder is initialized randomly. The number of prompt vectors is set to 8, which is equal to 1% of the number of multi-modal representation vectors, meeting the need for lightweight. For multi-modal encoding, we adopt the transformer-based structure with 12 layers and 768 dimensional hidden states. The whole model is trained in end-to-end manner. In addition, we adopt the AdamW [22] optimizer with an initial learning rate of

<sup>1</sup><https://github.com/tylin/coco-caption>

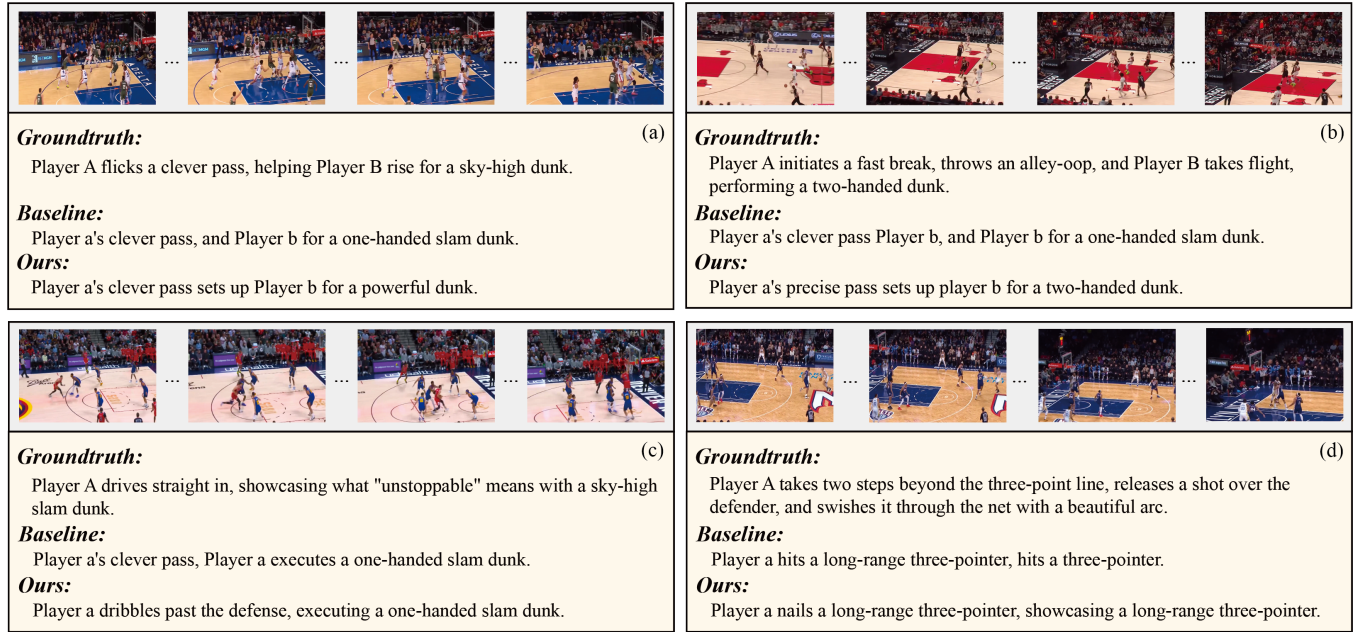

Figure 7: Qualitative examples generated by our benchmark model.

3e-5 and use a learning rate warm-up during the early 10% training steps followed by linear decay.

## 5.2 Ablation Study

To verify the effectiveness of the designed prompt, we show the performance changes in the last block of Table 3 by removing the prompt and simply input the concatenated multi-modal embeddings to the multi-modal encoder for the following commentary generation, which obviously results in a decline in model performance across all evaluation metrics. The results suggest that the performance of commentary generation can be greatly lifted by using prompt for promoting multi-modal feature fusion. Moreover, the model without prompt setting is selected as the baseline model for comparison in experiment analysis, which is discussed in the following section.

## 5.3 Results and Analysis

**Compare to the State of the Art.** We consider four up-to-date baselines for comparison. Table 3 lists the main results on the commentary generation task. According to Table 3, our benchmark model demonstrates the capability to generate more accurate and higher-quality commentaries when compared with the baselines. We attribute the superior performance of our benchmark model to two main factors. Firstly, the end-to-end setting enables the modules to be iteratively updated within a unified framework, enhancing the compatibility between each module. Additionally, the well-designed prompt plays a crucial role in facilitating the fusion of multi-modal features, thereby promoting the downstream commentary generation task. However, from an intuitive perspective, the models' performance metrics on our dataset seem comparatively lower than on other datasets. This can be attributed to the inherent

complexity of generating commentary for sports highlight videos. The intricate sentence structures and highly descriptive content in our dataset pose significant challenges to the learning process of the model. Despite this, our model serves as an inspiration for future efforts to address the challenges in sports highlight commentary generation.

| Model            | Bleu@4     | METEOR      | Rouge-L     | CIDEr       |
|------------------|------------|-------------|-------------|-------------|
| Swinbert [34]    | 3.2        | 12.5        | 27.6        | 11.7        |
| UniVL [38]       | 2.9        | 11.3        | 18.2        | 6.3         |
| UniVL+MELTR [23] | 3.6        | 12.4        | 27.8        | 11.4        |
| CoCap [49]       | 3.8        | 12.6        | 27.7        | 11.8        |
| w/o prompt       | 3.2        | 12.4        | 27.3        | 10.9        |
| ours             | <b>4.1</b> | <b>12.9</b> | <b>28.7</b> | <b>12.2</b> |

Table 3: Comparison of the proposed benchmark model with the state of the art works for commentary generation task on BH-Commentary dataset.

**Qualitative Analysis.** To further qualitatively assess the performance of our benchmark model in the commentary generation task, Figure 7 shows several examples about the highlight videos and corresponding commentaries obtained from groundtruth, baseline model and benchmark model. These examples indicate that our benchmark model can recognize the visual contents, and generate accurate terms and descriptive sentences. In both examples, the generated commentaries can cover the key technical moves of the players. In specific, for the first example, the video showcases the clever pass and powerful dunk executed by players. As shown in Figure 7(a), our model can accurately generate commentary that



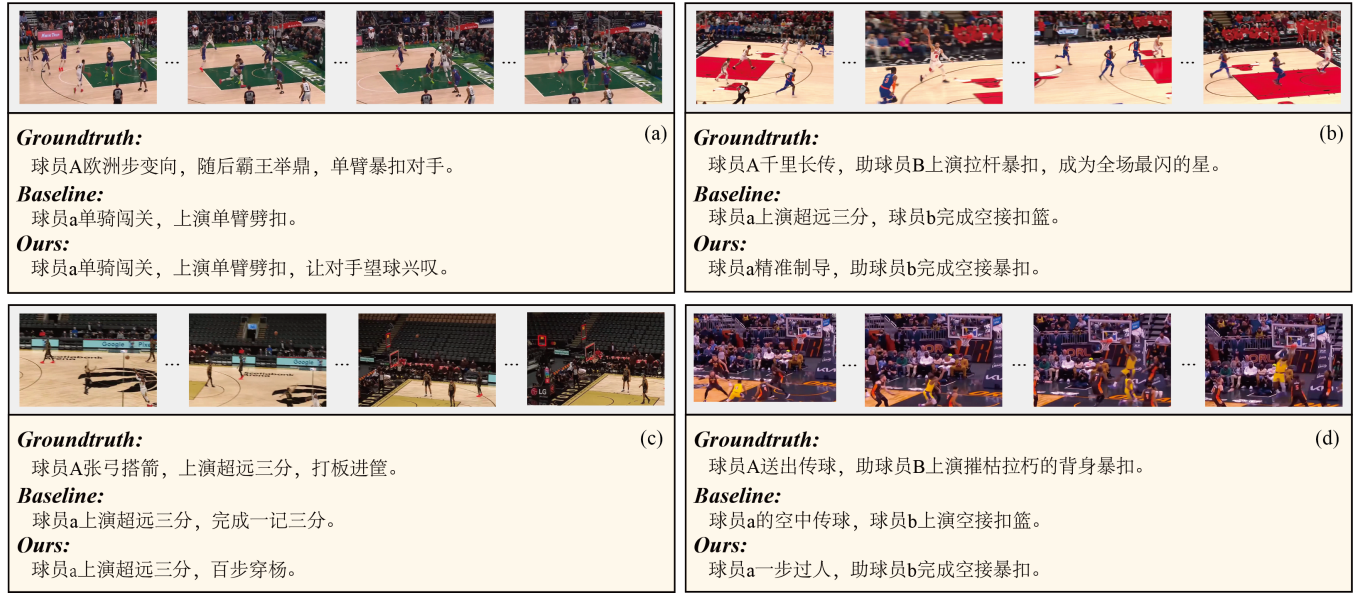

Figure 8: Qualitative examples generated by our benchmark model in Chinese version.

encompasses detailed actions and matches the groundtruth. In contrast, the baseline model is not able to generate the appropriate vocabulary to link the two actions, thereby failing to depict the coordination between the players. For the second example shown in Figure 7(b), we can observe that our model accurately generates the basketball skill action "two-handed dunk," which aligns with the groundtruth. In contrast, the baseline model fails to do so. As shown in Figure 7(c), in the third example, the commentary produced by our model accurately describes the actions "dribbles past the defense" and "one-handed slam dunk," which correspond to "drives straight in" and "sky-high slam dunk" in the groundtruth, respectively. While the baseline model, though correctly generating the term "one-handed slam dunk," provides inaccurate information with "clever pass." In the fourth example, as shown in Figure 7(d), our model delivers precise commentary, stating that the player successfully nails a long-range three-pointer, followed by a concise summary description. While the baseline model just repeats the given information.

**Chinese Version.** We also conducted a qualitative analysis on the Chinese version of the dataset, as illustrated in Figure 8. Our model accurately provides descriptions in the commentary, enriched with the suitable idioms. Specifically, in the first example, the highlight video showcases the player's dynamic and powerful dunk as he breaks through the defense. As shown in Figure 8(a), our model excels in generating accurate commentary that matches with the groundtruth and provides a summary description. In the second example, shown in Figure 8(b), we can observe that our model accurately generates the basketball skill actions based on precise pass and dunk, which is consistent with the groundtruth. In contrast, the baseline model produces inaccurate information with "three-pointer." As shown in Figure 8(c), in the third example, the commentary generated by our model accurately provides the term "three-pointer" and corresponding description. While the baseline

model just repeats the given information. In the fourth example shown in Figure 8(d), our model outperforms the baseline by offering additional detailed information about Player A before executing the pass, which is not mentioned but actually true in the video.

**Shortcoming.** During experiments, we also find some shortcomings in our benchmark model. Our model may sometimes fail to recognize similar movements, such as layups and dunks. Moreover, as shown in Figure 7 and Figure 8, compared with the groundtruth, out generated commentary may lack some background information description like "fast break", and does not have the ability to generate such statements like "showcasing what "unstoppable" means with a sky-high slam dunk". Our benchmark model serves as inspiration here. Addressing the challenge of enabling the model to understand these statements and generate them in the appropriate context remains a task that needs further exploration in subsequent research.

## 6 CONCLUSION

In this work, we create a descriptive basketball highlight video dataset for sports highlight commentary generation task. We propose a benchmark model for this task and outperform the state of the art models. Extensive experiments demonstrate the effectiveness of the proposed benchmark model and validity of the collected dataset. Due to the rich content of descriptive commentary, it is apparent that there is room for improvement in the performance of the model for the sports highlight commentary generation task, which remains research direction for subsequent studies. Our benchmark model serves as an inspiration here for the further research.

## REFERENCES

- [1] Jean-Baptiste Alayrac, Jeff Donahue, Pauline Luc, Antoine Miech, Iain Barr, Yana Hasson, Karel Lenc, Arthur Mensch, Katherine Millican, Malcolm Reynolds, et al. 2022. Flamingo: a Visual Language Model for Few-Shot Learning. In *Adv. Neural Inform. Process. Syst.*



- [2] Anurag Arnab, Mostafa Dehghani, Georg Heigold, Chen Sun, Mario Lucić, and Cordelia Schmid. 2021. Vivit: A video vision transformer. In *Int. Conf. Comput. Vis.* 6836–6846.
- [3] Max Bain, Arsha Nagrani, Gül Varol, and Andrew Zisserman. 2021. Frozen in time: A joint video and image encoder for end-to-end retrieval. In *Int. Conf. Comput. Vis.* 1728–1738.
- [4] Satantjeet Banerjee and Alon Lavie. 2005. METEOR: An automatic metric for MT evaluation with improved correlation with human judgments. In *Annual Meeting of the Association for Computational Linguistics Workshop*. 65–72.
- [5] Gedas Bertasius, Heng Wang, and Lorenzo Torresani. 2021. Is Space-Time Attention All You Need for Video Understanding?. In *International Conference on Machine Learning*. 813–824.
- [6] Shyamal Buch, Cristóbal Eyzaguirre, Adrien Gaidon, Jiajun Wu, Li Fei-Fei, and Juan Carlos Niebles. 2022. Revisiting the “video” in video-language understanding. In *IEEE Conf. Comput. Vis. Pattern Recog.* 2917–2927.
- [7] Fabian Caba Heilbron, Victor Escorcia, Bernard Ghanem, and Juan Carlos Niebles. 2015. ActivityNet: A large-scale video benchmark for human activity understanding. In *IEEE Conf. Comput. Vis. Pattern Recog.* 961–970.
- [8] Joao Carreira and Andrew Zisserman. 2017. Quo vadis, action recognition? a new model and the kinetics dataset. In *IEEE Conf. Comput. Vis. Pattern Recog.* 6299–6308.
- [9] David Chen and William B Dolan. 2011. Collecting highly parallel data for paraphrase evaluation. In *Annual Meeting of the Association for Computational Linguistics*. 190–200.
- [10] Xinlei Chen, Hao Fang, Tsung-Yi Lin, Ramakrishna Vedantam, Saurabh Gupta, Piotr Dollár, and C Lawrence Zitnick. 2015. Microsoft coco captions: Data collection and evaluation server. *arXiv preprint arXiv:1504.00325* (2015).
- [11] Pradipto Das, Chenliang Xu, Richard F Doell, and Jason J Corso. 2013. A thousand frames in just a few words: Lingual description of videos through latent topics and sparse object stitching. In *IEEE Conf. Comput. Vis. Pattern Recog.* 2634–2641.
- [12] Jacob Devlin, Ming-Wei Chang, Kenton Lee, and Kristina Toutanova. 2018. Bert: Pre-training of deep bidirectional transformers for language understanding. *arXiv preprint arXiv:1810.04805* (2018).
- [13] Alexey Dosovitskiy, Lucas Beyer, Alexander Kolesnikov, Dirk Weissenborn, Xi-aohua Zhai, Thomas Unterthiner, Mostafa Dehghani, Matthias Minderer, Georg Heigold, Sylvain Gelly, et al. 2021. An image is worth 16x16 words: Transformers for image recognition at scale. In *Int. Conf. Learn. Represent.*
- [14] Haoqi Fan, Bo Xiong, Karttikeya Mangalam, Yanghao Li, Zhicheng Yan, Jitendra Malik, and Christoph Feichtenhofer. 2021. Multiscale vision transformers. In *Int. Conf. Comput. Vis.* 6824–6835.
- [15] Zhe Gan, Yen-Chun Chen, Linjie Li, Chen Zhu, Yu Cheng, and Jingjing Liu. 2020. Large-scale adversarial training for vision-and-language representation learning. In *Adv. Neural Inform. Process. Syst.* 6616–6628.
- [16] Satya Krishna Gorti, Noël Vouitsis, Junwei Ma, Keyvan Golestan, Maksims Volkovs, Animesh Garg, and Guangwei Yu. 2022. X-pool: Cross-modal language-video attention for text-video retrieval. In *IEEE Conf. Comput. Vis. Pattern Recog.* 5006–5015.
- [17] Xin Gu, Guang Chen, Yufei Wang, Libo Zhang, Tiejian Luo, and Longyin Wen. 2023. Text with Knowledge Graph Augmented Transformer for Video Captioning. In *IEEE Conf. Comput. Vis. Pattern Recog.* 18941–18951.
- [18] Kai Han, An Xiao, Enhua Wu, Jianyuan Guo, Chunjing Xu, and Yunhe Wang. 2021. Transformer in transformer. In *Adv. Neural Inform. Process. Syst.* 15908–15919.
- [19] Lei Ji, Xianglin Guo, Haoyang Huang, and Xilin Chen. 2021. Hierarchical context-aware network for dense video event captioning. In *Annual Meeting of the Association for Computational Linguistics*. 2004–2013.
- [20] Menglin Jia, Luming Tang, Bor-Chun Chen, Claire Cardie, Serge Belongie, Bharath Hariharan, and Ser-Nam Lim. 2022. Visual prompt tuning. In *Eur. Conf. Comput. Vis.* 709–727.
- [21] Jacob Devlin Ming-Wei Chang Kenton and Lee Kristina Toutanova. 2019. BERT: Pre-training of Deep Bidirectional Transformers for Language Understanding. In *Annual Conference of the North American Chapter of the Association for Computational Linguistics*. 4171–4186.
- [22] Diederik P Kingma and Jimmy Ba. 2014. Adam: A method for stochastic optimization. *arXiv preprint arXiv:1412.6980* (2014).
- [23] Dohwan Ko, Joonmyung Choi, Hyeon Kyu Choi, Kyoung-Woon On, Byungseok Roh, and Hyunwoo J Kim. 2023. MELTR: Meta Loss Transformer for Learning to Fine-tune Video Foundation Models. In *IEEE Conf. Comput. Vis. Pattern Recog.* 20105–20115.
- [24] Niveda Krishnamoorthy, Girish Malkarnkar, Raymond Mooney, Kate Saenko, and Sergio Guadarrama. 2013. Generating natural-language video descriptions using text-mined knowledge. In *AAAI*. 541–547.
- [25] Zhenzhong Lan, Mingda Chen, Sebastian Goodman, Kevin Gimpel, Piyush Sharma, and Radu Soricut. 2020. Albert: A lite bert for self-supervised learning of language representations. In *Int. Conf. Learn. Represent.*
- [26] Thao Minh Le, Vuong Le, Svetha Venkatesh, and Truyen Tran. 2020. Hierarchical conditional relation networks for video question answering. In *IEEE Conf. Comput. Vis. Pattern Recog.* 9972–9981.
- [27] Jie Lei, Linjie Li, Luowei Zhou, Zhe Gan, Tamara L Berg, Mohit Bansal, and Jingjing Liu. 2021. Less is more: Clipbert for video-and-language learning via sparse sampling. In *IEEE Conf. Comput. Vis. Pattern Recog.* 7331–7341.
- [28] Brian Lester, Rami Al-Rfou, and Noah Constant. 2021. The power of scale for parameter-efficient prompt tuning. *arXiv preprint arXiv:2104.08691* (2021).
- [29] Gen Li, Nan Duan, Yuejian Fang, Ming Gong, and Daxin Jiang. 2020. Unicoder-vl: A universal encoder for vision and language by cross-modal pre-training. In *AAAI*. 11336–11344.
- [30] Junnan Li, Dongxu Li, Silvio Savarese, and Steven Hoi. 2023. Blip-2: Bootstrapping language-image pre-training with frozen image encoders and large language models. *arXiv preprint arXiv:2301.12597* (2023).
- [31] Linjie Li, Zhe Gan, Kevin Lin, Chung-Ching Lin, Zicheng Liu, Ce Liu, and Lijuan Wang. 2023. Lavender: Unifying video-language understanding as masked language modeling. In *IEEE Conf. Comput. Vis. Pattern Recog.* 23119–23129.
- [32] Yicong Li, Xiang Wang, Junbin Xiao, Wei Ji, and Tat-Seng Chua. 2022. Invariant grounding for video question answering. In *IEEE Conf. Comput. Vis. Pattern Recog.* 2928–2937.
- [33] Chin-Yew Lin. 2004. Rouge: A package for automatic evaluation of summaries. In *Text Summarization Branches Out*. 74–81.
- [34] Kevin Lin, Linjie Li, Chung-Ching Lin, Faisal Ahmed, Zhe Gan, Zicheng Liu, Yumao Lu, and Lijuan Wang. 2022. Swinbert: End-to-end transformers with sparse attention for video captioning. In *IEEE Conf. Comput. Vis. Pattern Recog.* 17949–17958.
- [35] Ze Liu, Yutong Lin, Yue Cao, Han Hu, Yixuan Wei, Zheng Zhang, Stephen Lin, and Baining Guo. 2021. Swin transformer: Hierarchical vision transformer using shifted windows. In *Int. Conf. Comput. Vis.* 10012–10022.
- [36] Ze Liu, Jia Ning, Yue Cao, Yixuan Wei, Zheng Zhang, Stephen Lin, and Han Hu. 2022. Video swin transformer. In *IEEE Conf. Comput. Vis. Pattern Recog.* 3202–3211.
- [37] Jiasen Lu, Dhruv Batra, Devi Parikh, and Stefan Lee. 2019. Vilbert: Pretraining task-agnostic visiolinguistic representations for vision-and-language tasks. In *Adv. Neural Inform. Process. Syst.*
- [38] Huaishao Luo, Lei Ji, Botian Shi, Haoyang Huang, Nan Duan, Tianrui Li, Jason Li, Taroon Bharti, and Ming Zhou. 2020. Univl: A unified video and language pre-training model for multimodal understanding and generation. *arXiv preprint arXiv:2002.06353* (2020).
- [39] Hassan Mkhallati, Anthony Cioppa, Silvio Giancola, Bernard Ghanem, and Marc Van Droogenbroeck. 2023. SoccerNet-Caption: Dense Video Captioning for Soccer Broadcasts Commentaries. In *IEEE Conf. Comput. Vis. Pattern Recog.* 5073–5084.
- [40] Daniel Neimark, Omri Bar, Maya Zohar, and Dotan Asselmann. 2021. Video transformer network. In *Int. Conf. Comput. Vis.* 3163–3172.
- [41] Long Ouyang, Jeffrey Wu, Xu Jiang, Diogo Almeida, Carroll Wainwright, Pamela Mishkin, Chong Zhang, Sandhini Agarwal, Katarina Slama, Alex Ray, et al. 2022. Training language models to follow instructions with human feedback. In *Adv. Neural Inform. Process. Syst.* 27730–27744.
- [42] Kishore Papineni, Salim Roukos, Todd Ward, and Wei-Jing Zhu. 2002. Bleu: a method for automatic evaluation of machine translation. In *Annual Meeting of the Association for Computational Linguistics*. 311–318.
- [43] Adam Paszke, Sam Gross, Francisco Massa, Adam Lerer, James Bradbury, Gregory Chanan, Trevor Killeen, Zeming Lin, Natalia Gimelshein, Luca Antiga, et al. 2019. Pytorch: An imperative style, high-performance deep learning library. In *Adv. Neural Inform. Process. Syst.*
- [44] Mengshi Qi, Yunhong Wang, Annan Li, and Jiebo Luo. 2019. Sports video captioning via attentive motion representation and group relationship modeling. *IEEE Trans. Circuit Syst. Video Technol.* 30, 8 (2019), 2617–2633.
- [45] Michaela Regneri, Marcus Rohrbach, Dominikus Wetzel, Stefan Thater, Bernt Schiele, and Manfred Pinkal. 2013. Grounding action descriptions in videos. *Transactions of the Association for Computational Linguistics* 1 (2013), 25–36.
- [46] Anna Rohrbach, Marcus Rohrbach, Niket Tandon, and Bernt Schiele. 2015. A dataset for movie description. In *IEEE Conf. Comput. Vis. Pattern Recog.* 3202–3212.
- [47] Hobin Ryu, Sunghun Kang, Haeyong Kang, and Chang D Yoo. 2021. Semantic grouping network for video captioning. In *AAAI*. 2514–2522.
- [48] Paul Hongsuck Seo, Arsha Nagrani, Anurag Arnab, and Cordelia Schmid. 2022. End-to-end generative pretraining for multimodal video captioning. In *IEEE Conf. Comput. Vis. Pattern Recog.* 17959–17968.
- [49] Yaojie Shen, Xin Gu, Kai Xu, Heng Fan, Longyin Wen, and Libo Zhang. 2023. Accurate and Fast Compressed Video Captioning. In *Int. Conf. Comput. Vis.* 15558–15567.
- [50] Chen Sun, Austin Myers, Carl Vondrick, Kevin Murphy, and Cordelia Schmid. 2019. Videobert: A joint model for video and language representation learning. In *Int. Conf. Comput. Vis.* 7464–7473.
- [51] Zhan Tong, Yibing Song, Jue Wang, and Limin Wang. 2022. Videomae: Masked autoencoders are data-efficient learners for self-supervised video pre-training. In *Adv. Neural Inform. Process. Syst.* 10078–10093.
- [52] Maria Tsimpoukelli, Jacob L Menick, Serkan Cabi, SM Eslami, Oriol Vinyals, and Felix Hill. 2021. Multimodal few-shot learning with frozen language models. In *Adv. Neural Inform. Process. Syst.* 200–212.

987  
988  
989  
990  
991  
992  
993  
994  
995  
996  
997  
998  
999  
1000  
1001  
1002  
1003  
1004  
1005  
1006  
1007  
1008  
1009  
1010  
1011  
1012  
1013  
1014  
1015  
1016  
1017  
1018  
1019  
1020  
1021  
1022  
1023  
1024  
1025  
1026  
1027  
1028  
1029  
1030  
1031  
1032  
1033  
1034  
1035  
1036  
1037  
1038  
1039  
1040  
1041  
1042  
1043  
1044

- [53] Ashish Vaswani, Noam Shazeer, Niki Parmar, Jakob Uszkoreit, Llion Jones, Aidan N Gomez, Lukasz Kaiser, and Illia Polosukhin. 2017. Attention is all you need. In *Adv. Neural Inform. Process. Syst.*
- [54] Ramakrishna Vedantam, C Lawrence Zitnick, and Devi Parikh. 2015. Cider: Consensus-based image description evaluation. In *IEEE Conf. Comput. Vis. Pattern Recog.* 4566–4575.
- [55] Teng Wang, Ruimao Zhang, Zhichao Lu, Feng Zheng, Ran Cheng, and Ping Luo. 2021. End-to-end dense video captioning with parallel decoding. In *Int. Conf. Comput. Vis.* 6847–6857.
- [56] Xin Wang, Jiawei Wu, Junkun Chen, Lei Li, Yuan-Fang Wang, and William Yang Wang. 2019. Vatex: A large-scale, high-quality multilingual dataset for video-and-language research. In *Int. Conf. Comput. Vis.* 4581–4591.
- [57] Zhenhailong Wang, Manling Li, Ruochen Xu, Luowei Zhou, Jie Lei, Xudong Lin, Shuohang Wang, Ziyi Yang, Chenguang Zhu, Derek Hoiem, et al. 2022. Language Models with Image Descriptors are Strong Few-Shot Video-Language Learners. In *Adv. Neural Inform. Process. Syst.*
- [58] Haiping Wu, Bin Xiao, Noel Codella, Mengchen Liu, Xiyang Dai, Lu Yuan, and Lei Zhang. 2021. Cvt: Introducing convolutions to vision transformers. In *Int. Conf. Comput. Vis.* 22–31.
- [59] Jun Xu, Tao Mei, Ting Yao, and Yong Rui. 2016. Msr-vtt: A large video description dataset for bridging video and language. In *IEEE Conf. Comput. Vis. Pattern Recog.* 5288–5296.
- [60] Ran Xu, Caiming Xiong, Wei Chen, and Jason Corso. 2015. Jointly modeling deep video and compositional text to bridge vision and language in a unified framework. In *AAAI*. 2346–2352.
- [61] Shen Yan, Xuehan Xiong, Anurag Arnab, Zhichao Lu, Mi Zhang, Chen Sun, and Cordelia Schmid. 2022. Multiview transformers for video recognition. In *IEEE Conf. Comput. Vis. Pattern Recog.* 3333–3343.
- [62] Antoine Yang, Arsha Nagrani, Paul Hongsuck Seo, Antoine Miech, Jordi Pont-Tuset, Ivan Laptev, Josef Sivic, and Cordelia Schmid. 2023. Vid2seq: Large-scale pretraining of a visual language model for dense video captioning. In *IEEE Conf. Comput. Vis. Pattern Recog.* 10714–10726.
- [63] Hanhua Ye, Guorong Li, Yuankai Qi, Shuhui Wang, Qingming Huang, and Ming-Hsuan Yang. 2022. Hierarchical modular network for video captioning. In *IEEE Conf. Comput. Vis. Pattern Recog.* 17939–17948.
- [64] Huanyu Yu, Shuo Cheng, Bingbing Ni, Minsi Wang, Jian Zhang, and Xiaokang Yang. 2018. Fine-grained video captioning for sports narrative. In *IEEE Conf. Comput. Vis. Pattern Recog.* 6006–6015.
- [65] Li Yuan, Yunpeng Chen, Tao Wang, Weihao Yu, Yujun Shi, Zi-Hang Jiang, Francis EH Tay, Jiashi Feng, and Shuicheng Yan. 2021. Tokens-to-token vit: Training vision transformers from scratch on imagenet. In *Int. Conf. Comput. Vis.* 558–567.
- [66] Wei Zhang, Bairui Wang, Lin Ma, and Wei Liu. 2019. Reconstruct and represent video contents for captioning via reinforcement learning. *IEEE Trans. Pattern Anal. Mach. Intell.* 42, 12 (2019), 3088–3101.
- [67] Yanyi Zhang, Xinyu Li, Chunhui Liu, Bing Shuai, Yi Zhu, Biagio Brattoli, Hao Chen, Ivan Marsic, and Joseph Tighe. 2021. Vidtr: Video transformer without convolutions. In *Int. Conf. Comput. Vis.* 13577–13587.
- [68] Ziqi Zhang, Yaya Shi, Chunfeng Yuan, Bing Li, Peijin Wang, Weiming Hu, and Zheng-Jun Zha. 2020. Object relational graph with teacher-recommended learning for video captioning. In *IEEE Conf. Comput. Vis. Pattern Recog.* 13278–13288.
- [69] Bin Zhao, Xuelong Li, and Xiaoqiang Lu. 2019. CAM-RNN: Co-attention model based RNN for video captioning. *IEEE Trans. Image Process.* 28, 11 (2019), 5552–5565.
- [70] Qi Zheng, Chaoyue Wang, and Dacheng Tao. 2020. Syntax-aware action targeting for video captioning. In *IEEE Conf. Comput. Vis. Pattern Recog.* 13096–13105.
- [71] Luowei Zhou, Chenliang Xu, and Jason Corso. 2018. Towards automatic learning of procedures from web instructional videos. In *AAAI*.
- [72] Luowei Zhou, Yingbo Zhou, Jason J Corso, Richard Socher, and Caiming Xiong. 2018. End-to-end dense video captioning with masked transformer. In *IEEE Conf. Comput. Vis. Pattern Recog.* 8739–8748.
- [73] Linchao Zhu and Yi Yang. 2020. Actbert: Learning global-local video-text representations. In *IEEE Conf. Comput. Vis. Pattern Recog.* 8746–8755.
